# Supplementary material for: Perampanel Add-on to Standard Radiochemotherapy in vivo Promotes Neuroprotection in a Rodent F98 Glioma Model
Source: PubMed Central journal article supplement (PMC7734300; doi:10.3389/fnins.2020.598266), 2020-11-30
Supplement: Data_Sheet_1.pdf [file Data_Sheet_1.pdf]

## Supplementary Material

### Experimental treatment protocol

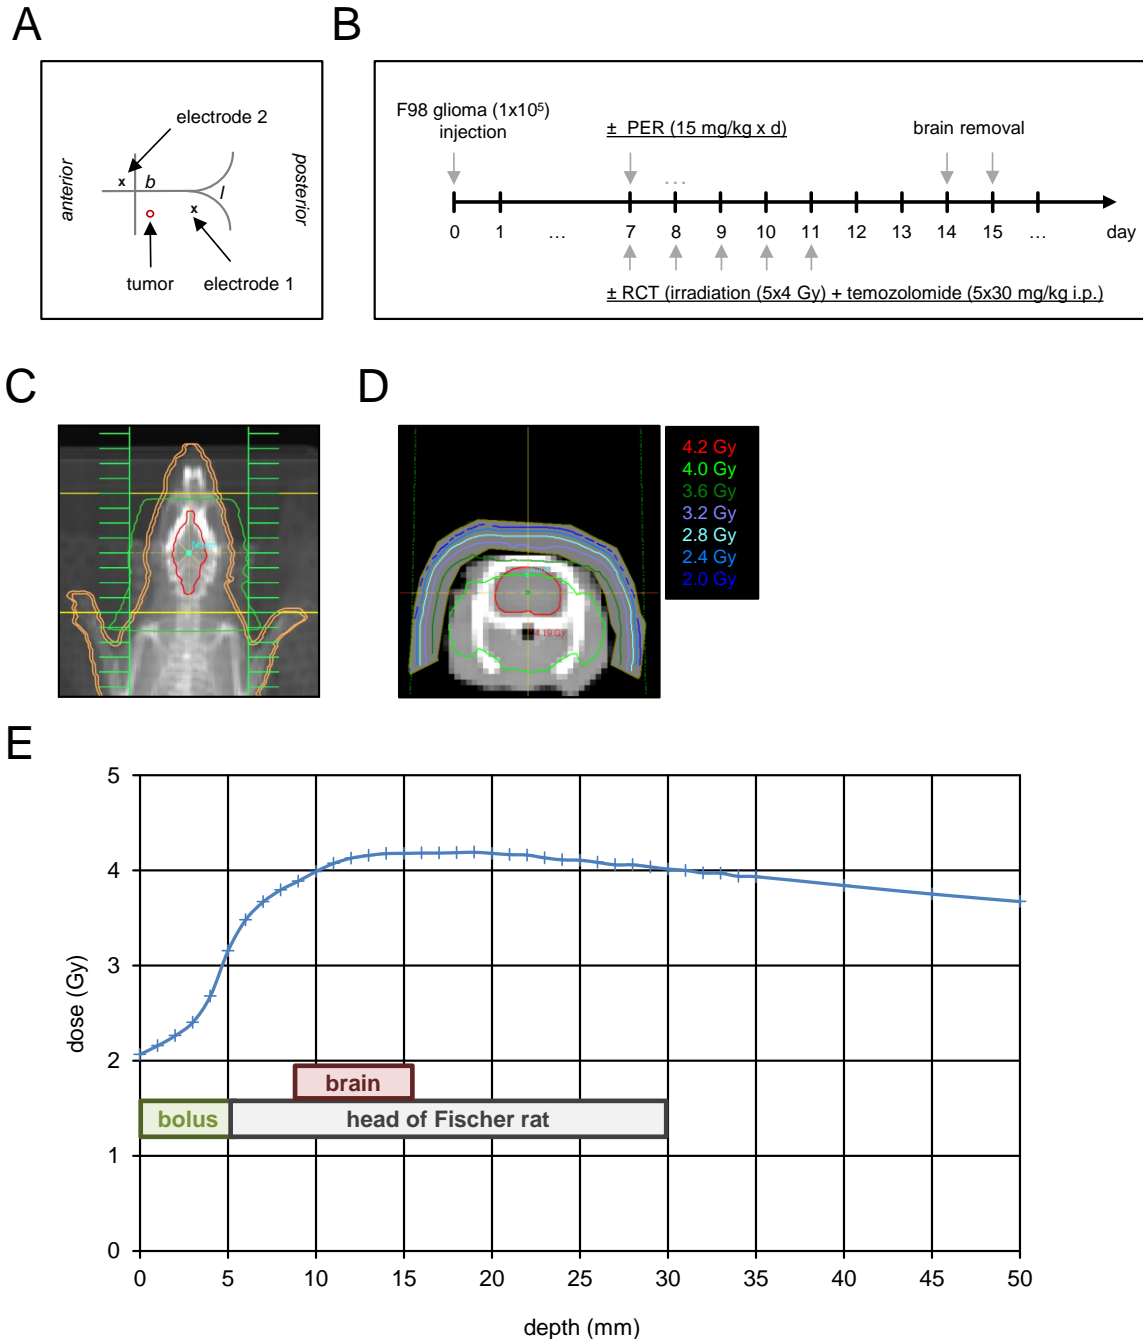

**Supplementary Figure 1.** Experimental treatment protocol. **(A)** stereotactic coordinates of tumor injection (1.8 mm posterior, 2.5 mm left), EEG electrode 1 (7.0 mm posterior, 1.5 mm left), and EEG electrode 2 (2.0 mm anterior, 1.5 mm right) in reference to bregma (b); l=lambda. **(B)** Illustration of the experimental approach for investigation of PER action in combination with a standard RCT protocol. **(C)** Beams eye view of the one field treatment plan for Fischer rat **(D)** Simulation of dose distribution. **(E)** Dosimetry calculation for irradiation of F98 glioma in Fischer 344 rats.

## Network activity models of F98 glioma slices

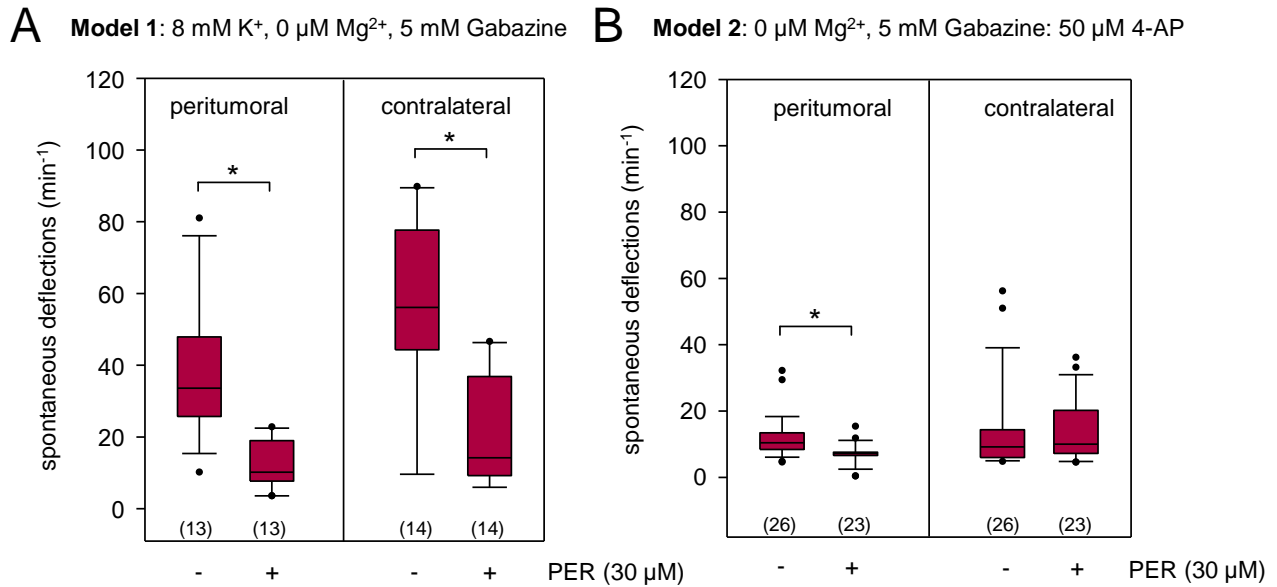

**Supplementary Figure 2.** Additional network activity models of F98-glioma brain slices. F98 glioma-bearing Fischer 344 rats were sacrificed two weeks after tumor implantation and acute brain slices were exposed two ex vivo models of network activity: **(A)** model 1: 8 mM K<sup>+</sup>, 0 mM Mg<sup>2+</sup>, and 5 μM gabazine; **(B)** model 2: 0 mM Mg<sup>2+</sup>, 5 μM gabazine, and 50 μM 4-Aminopyridine. Furthermore, slices were challenged to PER (30 μM). Data are represented in box plots, n=13-26, \*p<0.05 (Kruskal-Wallis test with post hoc Dunn's test).

## Original registration of ictal and interictal EEG events in F98 glioma

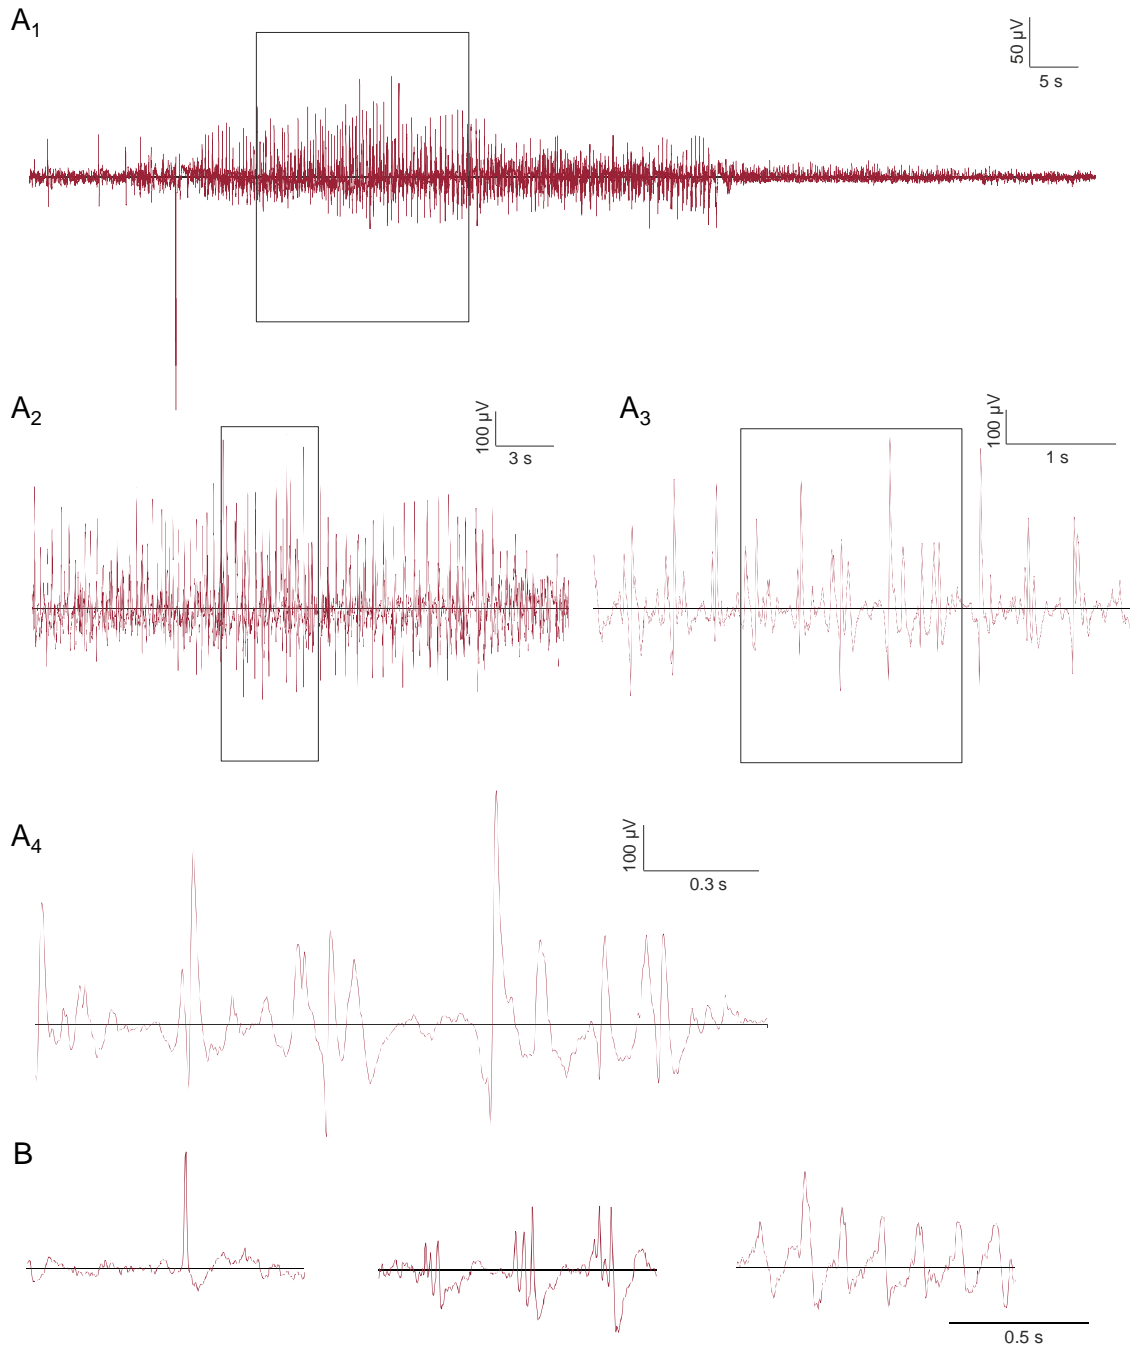

**Supplementary Figure 3.** Epileptiform potentials of video-EEG recordings in F98 glioma. Single-channel 24/7 video-EEG data were screened manually. Traces illustrate sample EEG potentials of (A) ictal (shown are more details of the seizure presented in Figure 1 and potentials in details) and (B) interictal discharges (left to right: spike, polyspike and spike-wave) in untreated Fischer 344 rats harboring F98 glioma

### Spike load of all experimental groups with glioma

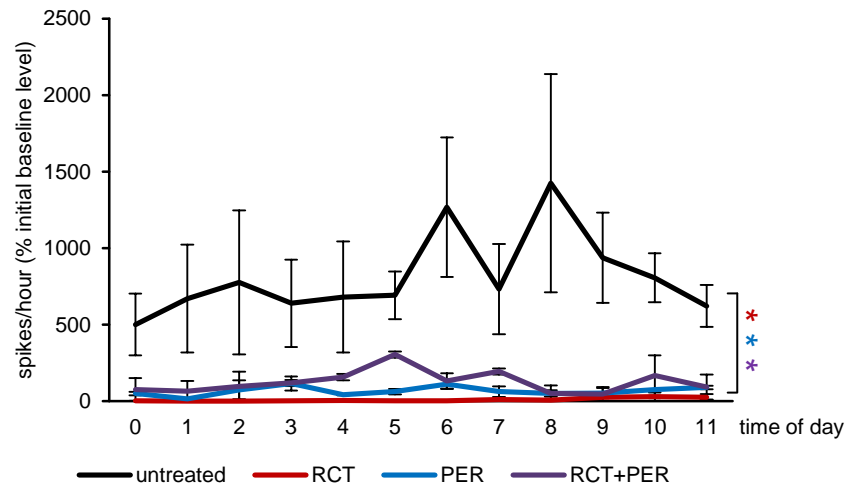

**Supplementary Figure 4.** Time course of interictal spike load of all four experimental groups with glioma. Data represent the mean $\pm$ SEM of last 12 hours in each cohort as percent of initial baseline level after surgery. Data were obtained from 4 untreated, 2 RCT-treated, 2 PER-treated, and 2 RCT+PER-treated animals. \* $p < 0.05$  (two-way ANOVA followed by Bonferroni t-test). No significant difference between time of day and treatment regime was found.

### Seizure occurrence of all experimental groups with glioma

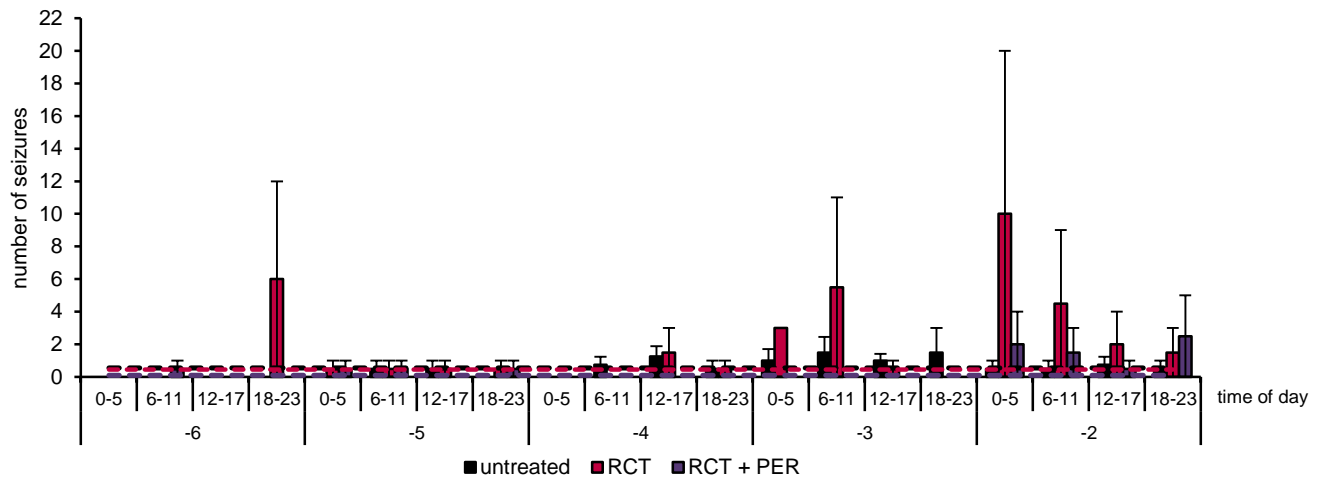

**Supplementary Figure 5.** Seizure occurrence of all four experimental groups with glioma. Data represent the mean of seizure on day -6 to -2 (relative to sacrifice). Dotted lines represent median of seizure of all five analyzed days. Please note that in PER-treated animals no seizures were detected.

**Table 1:** Survival (in days) of Fischer 344 rats after orthotopic injection of  $1 \times 10^5$  F98 glioma cells

| <b>no. of animals</b> | <b>untreated</b> | <b>RCT</b> | <b>PER</b> | <b>RCT+PER</b> |
|-----------------------|------------------|------------|------------|----------------|
| 1                     | 19               | 30         | 15         | 31             |
| 2                     | 18               | 50         | 26         | 31             |
| 3                     | 20               | 22         | 20         | 23             |
| 4                     | 16               | 24         |            | 35             |
| 5                     | 16               | 28         |            | 28             |
| 6                     | 15               |            |            | 23             |
| 7                     | 16               |            |            |                |
| 8                     | 15               |            |            |                |
| 9                     | 21               |            |            |                |
| 10                    | 10               |            |            |                |
| 11                    | 16               |            |            |                |
| 12                    | 14               |            |            |                |
| 13                    | 15               |            |            |                |
